# Supplementary material
Source: publisher site journal article supplement (https://www.dovepress.com/article/493766)

1. **Supplementary Tables**

| **Table S1.** The detailed information of the instrumental variables in immune cells. | | | | | | | | | | | |
| --- | --- | --- | --- | --- | --- | --- | --- | --- | --- | --- | --- |
| **Traits** | **SNP** | **Chr** | **Pos.** | **Effect allele** | **Other allele** | **EAF** | **Beta** | **SE** | ***P* value** | **R2** | **F statistic** |
| CD4 Treg AC | rs1028334 | 6 | 18584683 | G | A | 0.124 | 0.168 | 0.038 | 9.22E-06 | 0.006 | 20.796 |
| CD4 Treg AC | rs11772999 | 7 | 113991516 | G | T | 0.008 | 0.659 | 0.144 | 4.77E-06 | 0.007 | 23.001 |
| CD4 Treg AC | rs140842863 | 8 | 35828286 | A | C | 0.009 | 0.608 | 0.133 | 5.31E-06 | 0.007 | 23.363 |
| CD4 Treg AC | rs140960913 | 7 | 158180337 | T | C | 0.028 | 0.356 | 0.077 | 3.39E-06 | 0.007 | 23.348 |
| CD4 Treg AC | rs145600407 | 13 | 19280601 | T | C | 0.021 | -0.499 | 0.102 | 1.10E-06 | 0.010 | 34.581 |
| CD4 Treg AC | rs149951966 | 17 | 41137136 | C | T | 0.104 | 0.211 | 0.043 | 8.46E-07 | 0.008 | 28.323 |
| CD4 Treg AC | rs188505795 | 16 | 28223373 | T | G | 0.039 | 0.305 | 0.065 | 2.87E-06 | 0.007 | 23.730 |
| CD4 Treg AC | rs3184504 | 12 | 111884608 | C | T | 0.529 | -0.124 | 0.027 | 5.13E-06 | 0.008 | 26.063 |
| CD4 Treg AC | rs61839660 | 10 | 6094697 | T | C | 0.054 | 0.272 | 0.056 | 1.10E-06 | 0.008 | 25.952 |
| CD4 Treg AC | rs7162344 | 15 | 26030485 | A | G | 0.431 | -0.122 | 0.025 | 1.20E-06 | 0.007 | 25.197 |
| CD4 Treg AC | rs75596315 | 12 | 122520112 | T | C | 0.052 | 0.250 | 0.056 | 9.40E-06 | 0.006 | 21.147 |
| CD4 Treg AC | rs76202906 | 1 | 113476831 | A | C | 0.030 | -0.354 | 0.073 | 1.44E-06 | 0.007 | 25.026 |
| CD4 Treg AC | rs78334049 | 14 | 93385046 | A | G | 0.105 | 0.199 | 0.041 | 1.07E-06 | 0.007 | 25.488 |
| CD4 Treg AC | rs79684619 | 18 | 64907349 | G | A | 0.044 | 0.275 | 0.061 | 5.83E-06 | 0.006 | 21.900 |
| CD4 Treg AC | rs9343914 | 6 | 80166444 | T | C | 0.146 | -0.160 | 0.036 | 7.97E-06 | 0.006 | 21.864 |
| CD4 Treg AC | rs9709738 | 18 | 60137303 | C | G | 0.734 | -0.138 | 0.028 | 1.15E-06 | 0.007 | 25.372 |
| CD19 on CD20- CD38- | rs10426452 | 19 | 49907690 | A | G | 0.382 | -0.139 | 0.025 | 2.51E-08 | 0.009 | 33.110 |
| CD19 on CD20- CD38- | rs11161637 | 1 | 86021169 | G | A | 0.569 | -0.112 | 0.024 | 4.96E-06 | 0.006 | 22.078 |
| CD19 on CD20- CD38- | rs113932257 | 18 | 3127438 | C | T | 0.008 | 0.675 | 0.143 | 2.28E-06 | 0.007 | 25.504 |
| CD19 on CD20- CD38- | rs116862171 | 6 | 112145789 | G | A | 0.022 | -0.380 | 0.083 | 4.97E-06 | 0.006 | 22.218 |
| CD19 on CD20- CD38- | rs12438058 | 15 | 39819219 | C | T | 0.144 | 0.162 | 0.034 | 2.06E-06 | 0.006 | 23.500 |
| CD19 on CD20- CD38- | rs150625190 | 13 | 92727041 | G | T | 0.010 | -0.567 | 0.126 | 6.49E-06 | 0.006 | 21.848 |
| CD19 on CD20- CD38- | rs17480133 | 7 | 145783861 | C | G | 0.498 | -0.108 | 0.024 | 8.50E-06 | 0.006 | 21.116 |
| CD19 on CD20- CD38- | rs1966917 | 17 | 72108055 | A | G | 0.102 | -0.198 | 0.041 | 1.33E-06 | 0.007 | 26.040 |
| CD19 on CD20- CD38- | rs219712 | 21 | 27751176 | T | C | 0.197 | -0.146 | 0.030 | 1.42E-06 | 0.007 | 24.535 |
| CD19 on CD20- CD38- | rs41267263 | 1 | 36335349 | G | T | 0.017 | 0.434 | 0.095 | 5.48E-06 | 0.006 | 22.884 |
| CD19 on CD20- CD38- | rs62290470 | 4 | 5132403 | C | G | 0.058 | -0.233 | 0.052 | 7.10E-06 | 0.006 | 21.528 |
| CD19 on CD20- CD38- | rs62413604 | 6 | 49652991 | T | C | 0.004 | 0.934 | 0.203 | 4.32E-06 | 0.006 | 22.012 |
| CD19 on CD20- CD38- | rs6658147 | 1 | 18905298 | G | C | 0.543 | -0.122 | 0.025 | 7.27E-07 | 0.007 | 26.739 |
| CD19 on CD20- CD38- | rs67130681 | 18 | 71598971 | G | A | 0.247 | 0.135 | 0.028 | 1.59E-06 | 0.007 | 24.637 |
| CD19 on CD20- CD38- | rs72664677 | 14 | 32638300 | T | C | 0.258 | -0.126 | 0.028 | 5.65E-06 | 0.006 | 22.056 |
| CD19 on CD20- CD38- | rs7280618 | 21 | 41565479 | C | T | 0.033 | -0.335 | 0.069 | 1.22E-06 | 0.007 | 26.147 |
| CD19 on CD20- CD38- | rs75455523 | 15 | 96941966 | T | C | 0.020 | -0.411 | 0.090 | 5.04E-06 | 0.007 | 23.642 |
| CD19 on CD20- CD38- | rs78401267 | 3 | 189064197 | C | T | 0.034 | 0.332 | 0.069 | 1.48E-06 | 0.007 | 26.098 |
| CD19 on CD20- CD38- | rs9402148 | 6 | 129929521 | T | C | 0.042 | -0.270 | 0.061 | 9.00E-06 | 0.006 | 21.154 |
| CD4 on HLA DR+ CD4+ | rs10047088 | 1 | 228004140 | C | T | 0.883 | 0.192 | 0.041 | 3.38E-06 | 0.008 | 23.313 |
| CD4 on HLA DR+ CD4+ | rs10179730 | 2 | 188410351 | A | G | 0.897 | 0.197 | 0.044 | 8.83E-06 | 0.007 | 22.095 |
| CD4 on HLA DR+ CD4+ | rs10517576 | 4 | 154561623 | C | T | 0.011 | 0.578 | 0.124 | 3.46E-06 | 0.007 | 22.189 |
| CD4 on HLA DR+ CD4+ | rs10518646 | 1 | 81127816 | T | C | 0.014 | 0.506 | 0.114 | 8.82E-06 | 0.007 | 21.881 |
| CD4 on HLA DR+ CD4+ | rs10946649 | 6 | 23957018 | T | C | 0.063 | 0.264 | 0.055 | 1.79E-06 | 0.008 | 25.389 |
| CD4 on HLA DR+ CD4+ | rs11614716 | 12 | 6904146 | G | T | 0.249 | -0.154 | 0.031 | 6.83E-07 | 0.009 | 27.222 |
| CD4 on HLA DR+ CD4+ | rs11929631 | 3 | 164980538 | A | T | 0.053 | -0.269 | 0.059 | 5.92E-06 | 0.007 | 22.124 |
| CD4 on HLA DR+ CD4+ | rs12684941 | 9 | 37654930 | G | A | 0.468 | -0.121 | 0.027 | 6.04E-06 | 0.007 | 22.348 |
| CD4 on HLA DR+ CD4+ | rs13316780 | 3 | 108851829 | C | T | 0.012 | 0.564 | 0.123 | 4.72E-06 | 0.007 | 23.065 |
| CD4 on HLA DR+ CD4+ | rs166223 | 5 | 86031019 | A | T | 0.522 | 0.119 | 0.026 | 8.01E-06 | 0.007 | 21.581 |
| CD4 on HLA DR+ CD4+ | rs17002700 | 4 | 78417537 | G | T | 0.203 | 0.148 | 0.033 | 7.87E-06 | 0.007 | 21.843 |
| CD4 on HLA DR+ CD4+ | rs17088862 | 8 | 22835142 | A | T | 0.022 | 0.409 | 0.090 | 5.54E-06 | 0.007 | 22.569 |
| CD4 on HLA DR+ CD4+ | rs184989157 | 4 | 4214108 | T | C | 0.036 | -0.318 | 0.072 | 8.91E-06 | 0.007 | 21.890 |
| CD4 on HLA DR+ CD4+ | rs2524081 | 6 | 31242083 | C | G | 0.325 | 0.156 | 0.031 | 5.87E-07 | 0.011 | 33.020 |
| CD4 on HLA DR+ CD4+ | rs35032648 | 5 | 3225418 | C | T | 0.554 | 0.119 | 0.027 | 7.44E-06 | 0.007 | 21.585 |
| CD4 on HLA DR+ CD4+ | rs35996890 | 15 | 50184767 | T | A | 0.347 | 0.124 | 0.028 | 9.82E-06 | 0.007 | 21.449 |
| CD4 on HLA DR+ CD4+ | rs4371876 | 6 | 31067550 | A | G | 0.492 | 0.183 | 0.029 | 1.99E-10 | 0.017 | 52.122 |
| CD4 on HLA DR+ CD4+ | rs72822577 | 10 | 97168100 | A | T | 0.007 | 0.729 | 0.163 | 7.70E-06 | 0.007 | 21.803 |
| CD4 on HLA DR+ CD4+ | rs75036101 | 16 | 66348814 | A | T | 0.061 | -0.252 | 0.057 | 9.89E-06 | 0.007 | 22.254 |
| CD4 on HLA DR+ CD4+ | rs75559970 | 10 | 100518962 | T | G | 0.017 | 0.530 | 0.106 | 5.33E-07 | 0.009 | 28.463 |
| CD4 on HLA DR+ CD4+ | rs7819104 | 8 | 121748105 | T | A | 0.240 | -0.140 | 0.032 | 9.37E-06 | 0.007 | 22.130 |
| CD4 on HLA DR+ CD4+ | rs9357097 | 6 | 30285121 | T | C | 0.476 | 0.167 | 0.028 | 2.57E-09 | 0.014 | 43.092 |
| CD25 on CD39+ CD4+ | rs10047088 | 1 | 228004140 | C | T | 0.883 | 0.192 | 0.041 | 3.38E-06 | 0.008 | 22.246 |
| CD25 on CD39+ CD4+ | rs10179730 | 2 | 188410351 | A | G | 0.897 | 0.197 | 0.044 | 8.83E-06 | 0.007 | 21.083 |
| CD25 on CD39+ CD4+ | rs10517576 | 4 | 154561623 | C | T | 0.011 | 0.578 | 0.124 | 3.46E-06 | 0.007 | 21.173 |
| CD25 on CD39+ CD4+ | rs10518646 | 1 | 81127816 | T | C | 0.014 | 0.506 | 0.114 | 8.82E-06 | 0.007 | 20.879 |
| CD25 on CD39+ CD4+ | rs10946649 | 6 | 23957018 | T | C | 0.063 | 0.264 | 0.055 | 1.79E-06 | 0.008 | 24.226 |
| CD25 on CD39+ CD4+ | rs11614716 | 12 | 6904146 | G | T | 0.249 | -0.154 | 0.031 | 6.83E-07 | 0.009 | 25.976 |
| CD25 on CD39+ CD4+ | rs11929631 | 3 | 164980538 | A | T | 0.053 | -0.269 | 0.059 | 5.92E-06 | 0.007 | 21.112 |
| CD25 on CD39+ CD4+ | rs12684941 | 9 | 37654930 | G | A | 0.468 | -0.121 | 0.027 | 6.04E-06 | 0.007 | 21.325 |
| CD25 on CD39+ CD4+ | rs13316780 | 3 | 108851829 | C | T | 0.012 | 0.564 | 0.123 | 4.72E-06 | 0.007 | 22.009 |
| CD25 on CD39+ CD4+ | rs166223 | 5 | 86031019 | A | T | 0.522 | 0.119 | 0.026 | 8.01E-06 | 0.007 | 20.593 |
| CD25 on CD39+ CD4+ | rs17002700 | 4 | 78417537 | G | T | 0.203 | 0.148 | 0.033 | 7.87E-06 | 0.007 | 20.843 |
| CD25 on CD39+ CD4+ | rs17088862 | 8 | 22835142 | A | T | 0.022 | 0.409 | 0.090 | 5.54E-06 | 0.007 | 21.536 |
| CD25 on CD39+ CD4+ | rs184989157 | 4 | 4214108 | T | C | 0.036 | -0.318 | 0.072 | 8.91E-06 | 0.007 | 20.887 |
| CD25 on CD39+ CD4+ | rs2524081 | 6 | 31242083 | C | G | 0.325 | 0.156 | 0.031 | 5.87E-07 | 0.011 | 31.508 |
| CD25 on CD39+ CD4+ | rs35032648 | 5 | 3225418 | C | T | 0.554 | 0.119 | 0.027 | 7.44E-06 | 0.007 | 20.597 |
| CD25 on CD39+ CD4+ | rs35996890 | 15 | 50180635 | T | A | 0.347 | 0.124 | 0.028 | 9.82E-06 | 0.007 | 20.467 |
| CD25 on CD39+ CD4+ | rs4371876 | 6 | 31067550 | A | G | 0.492 | 0.183 | 0.029 | 1.99E-10 | 0.017 | 49.736 |
| CD25 on CD39+ CD4+ | rs72822577 | 10 | 97168100 | A | T | 0.007 | 0.729 | 0.163 | 7.70E-06 | 0.007 | 20.805 |
| CD25 on CD39+ CD4+ | rs75036101 | 16 | 66348814 | A | T | 0.061 | -0.252 | 0.057 | 9.89E-06 | 0.007 | 21.235 |
| CD25 on CD39+ CD4+ | rs75559970 | 10 | 100518962 | T | G | 0.017 | 0.530 | 0.106 | 5.33E-07 | 0.009 | 27.160 |
| CD25 on CD39+ CD4+ | rs7819104 | 8 | 121748105 | T | A | 0.240 | -0.140 | 0.032 | 9.37E-06 | 0.007 | 21.117 |
| CD25 on CD39+ CD4+ | rs9357097 | 6 | 30285121 | T | C | 0.476 | 0.167 | 0.028 | 2.57E-09 | 0.014 | 41.119 |
| CD14 on CD33br HLA DR+ CD14dim | rs11003240 | 10 | 54641214 | T | C | 0.096 | -0.314 | 0.063 | 6.42E-07 | 0.017 | 27.518 |
| CD14 on CD33br HLA DR+ CD14dim | rs11007733 | 10 | 30059784 | T | C | 0.093 | -0.293 | 0.064 | 4.20E-06 | 0.014 | 23.179 |
| CD14 on CD33br HLA DR+ CD14dim | rs11117273 | 16 | 87483838 | A | G | 0.769 | 0.192 | 0.043 | 8.89E-06 | 0.013 | 20.956 |
| CD14 on CD33br HLA DR+ CD14dim | rs11624046 | 14 | 57370548 | T | C | 0.013 | 0.698 | 0.156 | 8.42E-06 | 0.012 | 19.482 |
| CD14 on CD33br HLA DR+ CD14dim | rs13111223 | 4 | 188692178 | G | A | 0.488 | -0.165 | 0.037 | 6.42E-06 | 0.014 | 21.791 |
| CD14 on CD33br HLA DR+ CD14dim | rs149153393 | 5 | 222611 | T | C | 0.069 | 0.325 | 0.073 | 9.71E-06 | 0.014 | 21.636 |
| CD14 on CD33br HLA DR+ CD14dim | rs1976058 | 2 | 111792734 | C | T | 0.019 | 0.599 | 0.132 | 6.08E-06 | 0.013 | 21.002 |
| CD14 on CD33br HLA DR+ CD14dim | rs2230186 | 7 | 134645319 | T | C | 0.062 | -0.382 | 0.076 | 5.39E-07 | 0.017 | 27.282 |
| CD14 on CD33br HLA DR+ CD14dim | rs2726036 | 16 | 28347140 | C | A | 0.396 | -0.174 | 0.037 | 3.11E-06 | 0.015 | 23.217 |
| CD14 on CD33br HLA DR+ CD14dim | rs3114703 | 7 | 22456928 | T | C | 0.485 | -0.163 | 0.036 | 7.73E-06 | 0.013 | 21.066 |
| CD14 on CD33br HLA DR+ CD14dim | rs4657282 | 1 | 163440621 | A | G | 0.161 | -0.245 | 0.049 | 6.33E-07 | 0.016 | 26.104 |
| CD14 on CD33br HLA DR+ CD14dim | rs4673986 | 2 | 216180100 | G | T | 0.992 | -0.965 | 0.218 | 9.71E-06 | 0.014 | 22.454 |
| CD14 on CD33br HLA DR+ CD14dim | rs73014922 | 19 | 17916591 | T | C | 0.054 | 0.380 | 0.081 | 2.83E-06 | 0.015 | 23.494 |
| CD14 on CD33br HLA DR+ CD14dim | rs74785984 | 12 | 22230399 | A | C | 0.088 | 0.308 | 0.064 | 1.41E-06 | 0.015 | 24.378 |
| CD14 on CD33br HLA DR+ CD14dim | rs7539387 | 1 | 102040284 | G | A | 0.723 | -0.217 | 0.042 | 3.21E-07 | 0.019 | 30.318 |
| CD14 on CD33br HLA DR+ CD14dim | rs79880157 | 13 | 84038649 | T | C | 0.024 | -0.567 | 0.119 | 2.14E-06 | 0.015 | 23.909 |
| CD14 on CD33br HLA DR+ CD14dim | rs9596613 | 13 | 52492525 | C | A | 0.259 | -0.203 | 0.042 | 1.43E-06 | 0.016 | 25.354 |
| CD4RA on TD CD4+ | rs10114587 | 9 | 133795282 | G | A | 0.046 | -0.292 | 0.064 | 5.00E-06 | 0.008 | 21.980 |
| CD4RA on TD CD4+ | rs111916169 | 5 | 78137524 | T | A | 0.011 | 0.618 | 0.132 | 2.85E-06 | 0.008 | 23.663 |
| CD4RA on TD CD4+ | rs11579717 | 1 | 199999121 | A | G | 0.005 | 1.190 | 0.202 | 4.31E-09 | 0.013 | 37.280 |
| CD4RA on TD CD4+ | rs116345427 | 3 | 146702237 | A | G | 0.004 | 1.005 | 0.224 | 7.50E-06 | 0.008 | 22.355 |
| CD4RA on TD CD4+ | rs11652274 | 17 | 26010931 | A | G | 0.119 | -0.189 | 0.042 | 6.04E-06 | 0.007 | 21.886 |
| CD4RA on TD CD4+ | rs116794175 | 1 | 194010208 | C | T | 0.005 | 0.891 | 0.201 | 9.64E-06 | 0.007 | 21.698 |
| CD4RA on TD CD4+ | rs117931526 | 6 | 117716047 | C | T | 0.001 | -2.267 | 0.498 | 5.41E-06 | 0.007 | 21.009 |
| CD4RA on TD CD4+ | rs13269202 | 8 | 70924735 | C | G | 0.097 | -0.204 | 0.046 | 7.95E-06 | 0.007 | 21.364 |
| CD4RA on TD CD4+ | rs1328601 | 10 | 125153605 | C | T | 0.988 | -0.567 | 0.127 | 8.78E-06 | 0.008 | 22.446 |
| CD4RA on TD CD4+ | rs13292669 | 9 | 132659104 | C | T | 0.194 | -0.153 | 0.034 | 8.90E-06 | 0.007 | 21.236 |
| CD4RA on TD CD4+ | rs141541045 | 1 | 182131075 | T | A | 0.006 | 0.964 | 0.177 | 5.33E-08 | 0.011 | 31.959 |
| CD4RA on TD CD4+ | rs147201746 | 2 | 15706963 | A | G | 0.013 | -0.601 | 0.122 | 8.72E-07 | 0.009 | 26.292 |
| CD4RA on TD CD4+ | rs1504496 | 4 | 45951996 | A | G | 0.026 | 0.384 | 0.084 | 4.68E-06 | 0.008 | 22.146 |
| CD4RA on TD CD4+ | rs17777079 | 5 | 100081982 | T | A | 0.036 | 0.350 | 0.073 | 1.92E-06 | 0.009 | 25.050 |
| CD4RA on TD CD4+ | rs181435089 | 6 | 69234703 | T | C | 0.025 | -0.416 | 0.087 | 1.72E-06 | 0.008 | 24.659 |
| CD4RA on TD CD4+ | rs1861266 | 2 | 40283459 | C | A | 0.189 | 0.156 | 0.035 | 6.34E-06 | 0.008 | 21.927 |
| CD4RA on TD CD4+ | rs2188219 | 17 | 5923525 | C | G | 0.400 | -0.124 | 0.028 | 8.21E-06 | 0.007 | 21.531 |
| CD4RA on TD CD4+ | rs34645541 | 1 | 195875605 | A | C | 0.010 | 0.702 | 0.141 | 6.52E-07 | 0.009 | 27.458 |
| CD4RA on TD CD4+ | rs4261817 | 22 | 49045798 | C | T | 0.479 | 0.120 | 0.027 | 8.48E-06 | 0.007 | 21.141 |
| CD4RA on TD CD4+ | rs4670907 | 2 | 39278066 | T | C | 0.890 | -0.209 | 0.044 | 2.01E-06 | 0.009 | 24.969 |
| CD4RA on TD CD4+ | rs4974277 | 3 | 70625844 | T | A | 0.041 | 0.321 | 0.069 | 3.16E-06 | 0.008 | 23.765 |
| CD4RA on TD CD4+ | rs541367304 | 1 | 198283058 | A | G | 0.003 | 2.073 | 0.280 | 1.70E-13 | 0.028 | 84.393 |
| CD4RA on TD CD4+ | rs56049135 | 12 | 102381732 | G | C | 0.001 | -2.141 | 0.410 | 1.87E-07 | 0.009 | 26.815 |
| CD4RA on TD CD4+ | rs7559619 | 2 | 38892207 | G | A | 0.346 | -0.214 | 0.029 | 1.09E-13 | 0.021 | 61.590 |
| CD4RA on TD CD4+ | rs76295302 | 10 | 2556079 | C | G | 0.051 | 0.271 | 0.061 | 8.05E-06 | 0.007 | 20.786 |
| CD4RA on TD CD4+ | rs78528853 | 3 | 26352969 | G | A | 0.018 | 0.462 | 0.104 | 8.53E-06 | 0.007 | 21.731 |
| CD4RA on TD CD4+ | rs78804476 | 19 | 662832 | A | G | 0.002 | 1.623 | 0.355 | 5.04E-06 | 0.008 | 24.621 |
| CD4RA on TD CD4+ | rs7894393 | 10 | 100120872 | C | T | 0.164 | 0.164 | 0.037 | 8.70E-06 | 0.007 | 21.639 |
| CD4RA on TD CD4+ | rs78948498 | 8 | 77159185 | G | C | 0.149 | 0.176 | 0.038 | 3.60E-06 | 0.008 | 22.931 |
| CD4RA on TD CD4+ | rs822833 | 1 | 234954585 | T | C | 0.301 | -0.139 | 0.030 | 3.77E-06 | 0.008 | 23.637 |
| CD4RA on TD CD4+ | rs929785 | 5 | 159153268 | C | T | 0.643 | 0.127 | 0.028 | 6.55E-06 | 0.007 | 21.750 |
| CD4RA on TD CD4+ | rs931816 | 7 | 9679455 | G | A | 0.880 | 0.187 | 0.042 | 7.70E-06 | 0.007 | 21.631 |

| **Table S2.** Pleiotropy and heterogeneity analyses for the association of LBP with immune cells. | | | | | | | | | |
| --- | --- | --- | --- | --- | --- | --- | --- | --- | --- |
| **Outcomes** | **nSNPs** | **Cochrane’s Q test** | |  | **MR-Egger pleiotropy test** | | | **MR-PRESSO** | **Global *P*** |
| **Q Value** | ***P* Value** |  | **Intercept** | **SE** | ***P* Value** |  |  |
| CD4 Treg AC | 20 | 18.975 | 0.458 |  | 0.029 | 0.015 | 0.075 | 21.822 | 0.431 |
| CD19 on CD20- CD38- | 15 | 6.453 | 0.954 |  | -0.017 | 0.031 | 0.589 | 7.437 | 0.942 |
| CD4 on HLA DR+ CD4+ | 20 | 25.998 | 0.130 |  | 0.001 | 0.019 | 0.963 | 28.170 | 0.183 |
| CD25 on CD39+ CD4+ | 16 | 3.781 | 0.998 |  | -0.002 | 0.017 | 0.892 | 4.209 | 0.999 |
| CD14 on CD33br HLA DR+ CD14dim | 20 | 17.825 | 0.534 |  | 0.006 | 0.022 | 0.782 | 19.396 | 0.568 |
| CD4RA on TD CD4+ | 20 | 17.105 | 0.583 |  | 0.005 | 0.016 | 0.758 | 18.351 | 0.642 |

LBP, low back pain; nSNPs, number of single-nucleotide polymorphisms; SE: **standard error**.

1. **Supplementary Figures**

**Figure S1.** Forest plots summarizing the Mendelian randomization results of low back pain with a causal relationship to immune cells. nSNPs, number of single-nucleotide polymorphisms; OR, odds ratio; CI, confidence interval; IVW, inverse variance weighted.


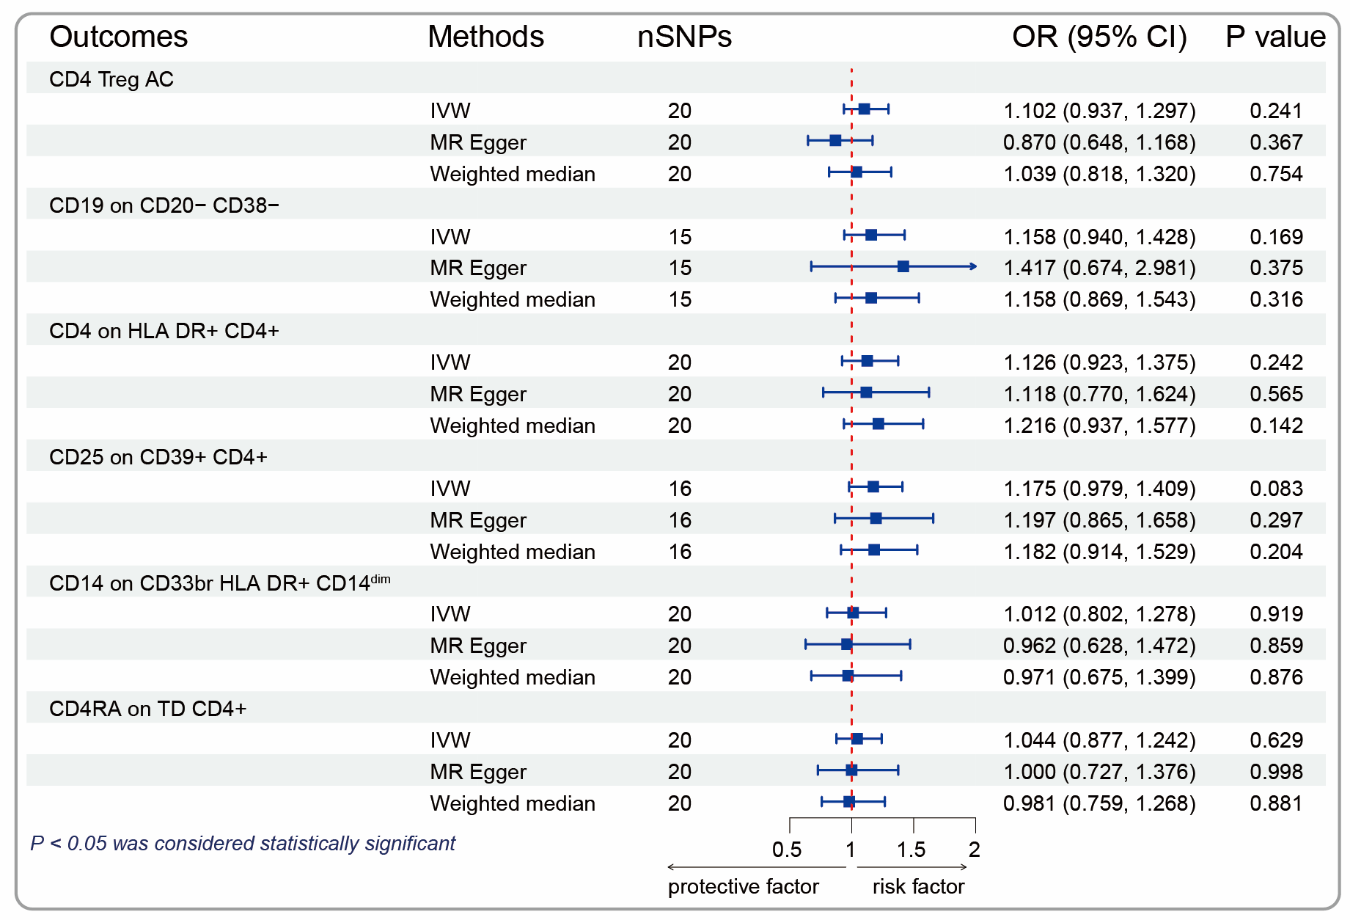


**Figure S2.** Scatterplots of potential effects of SNPs on low back pain and the risk of immune cells.


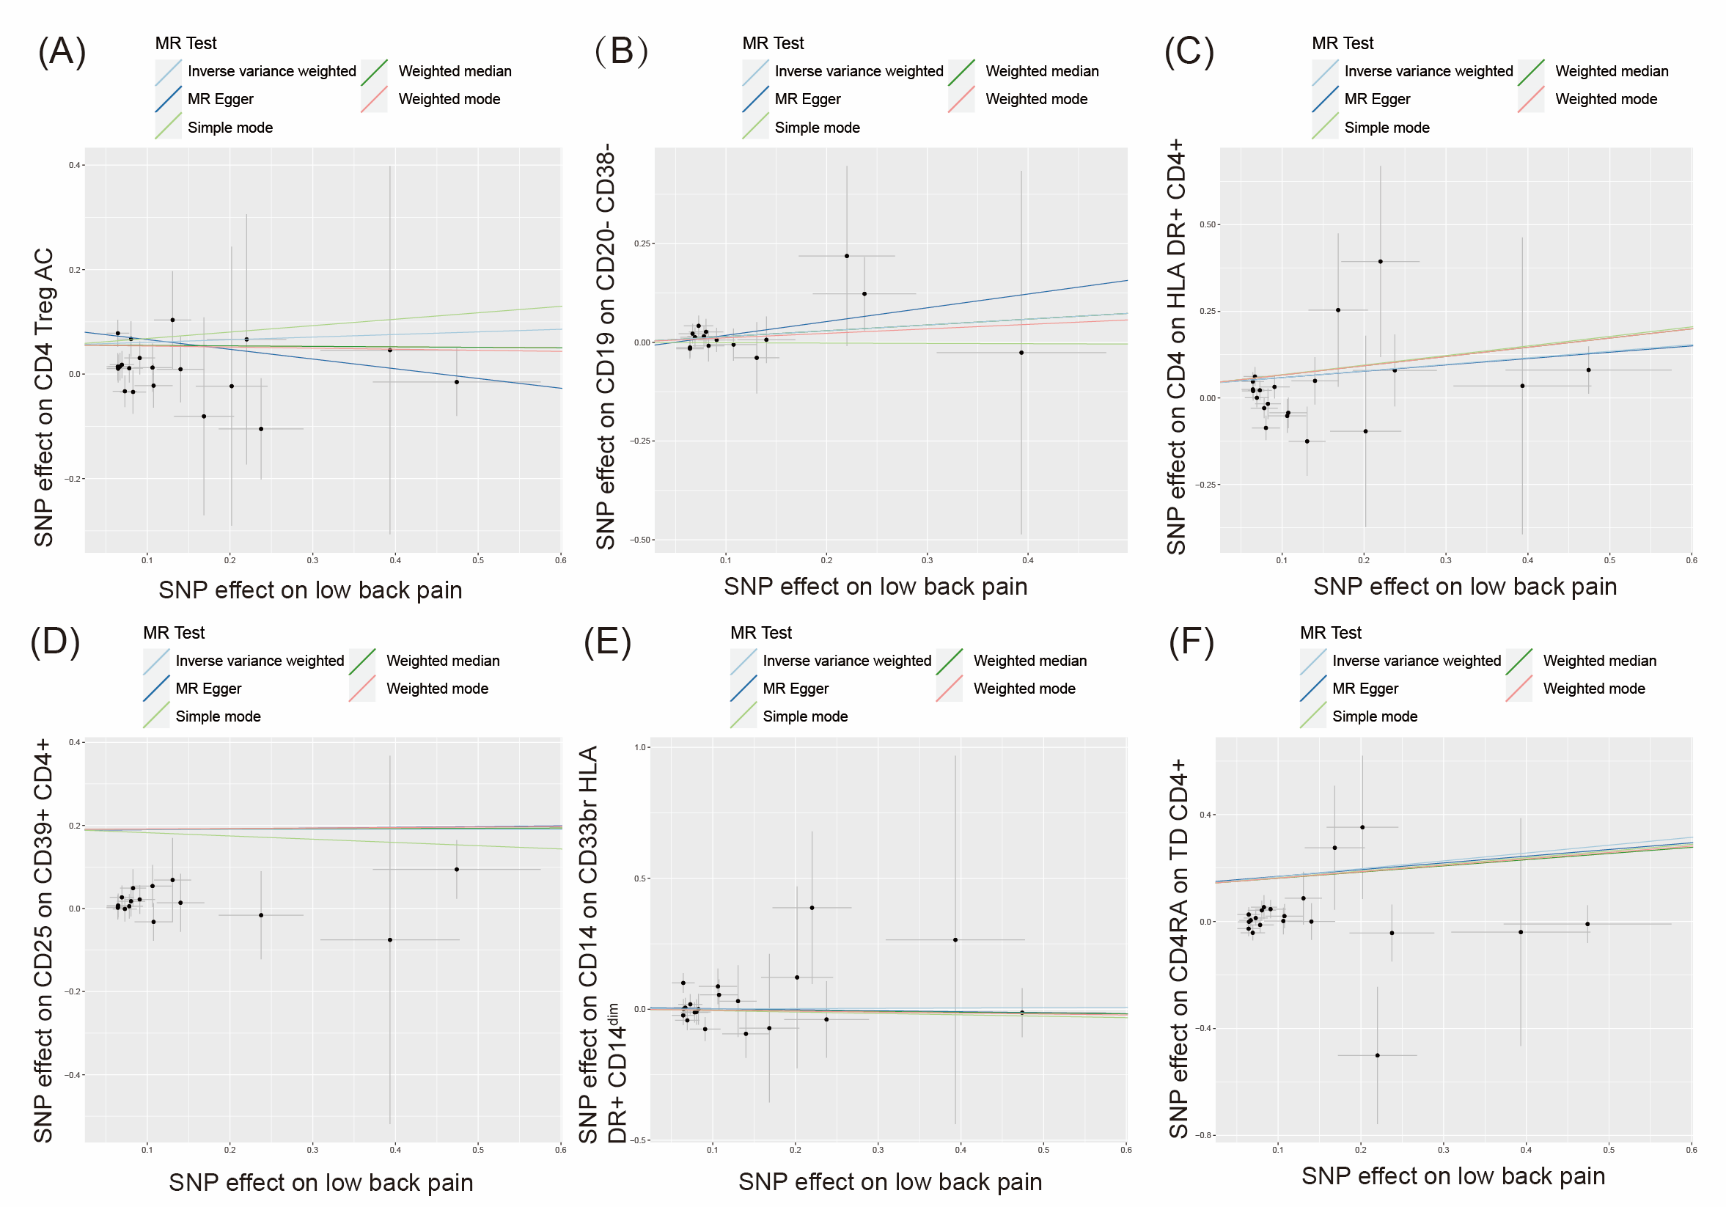


**Figure S3.** MR leave-one-out sensitivity analyses for low back pain on immune cells. MR, Mendelian randomization; LBP, low back pain.


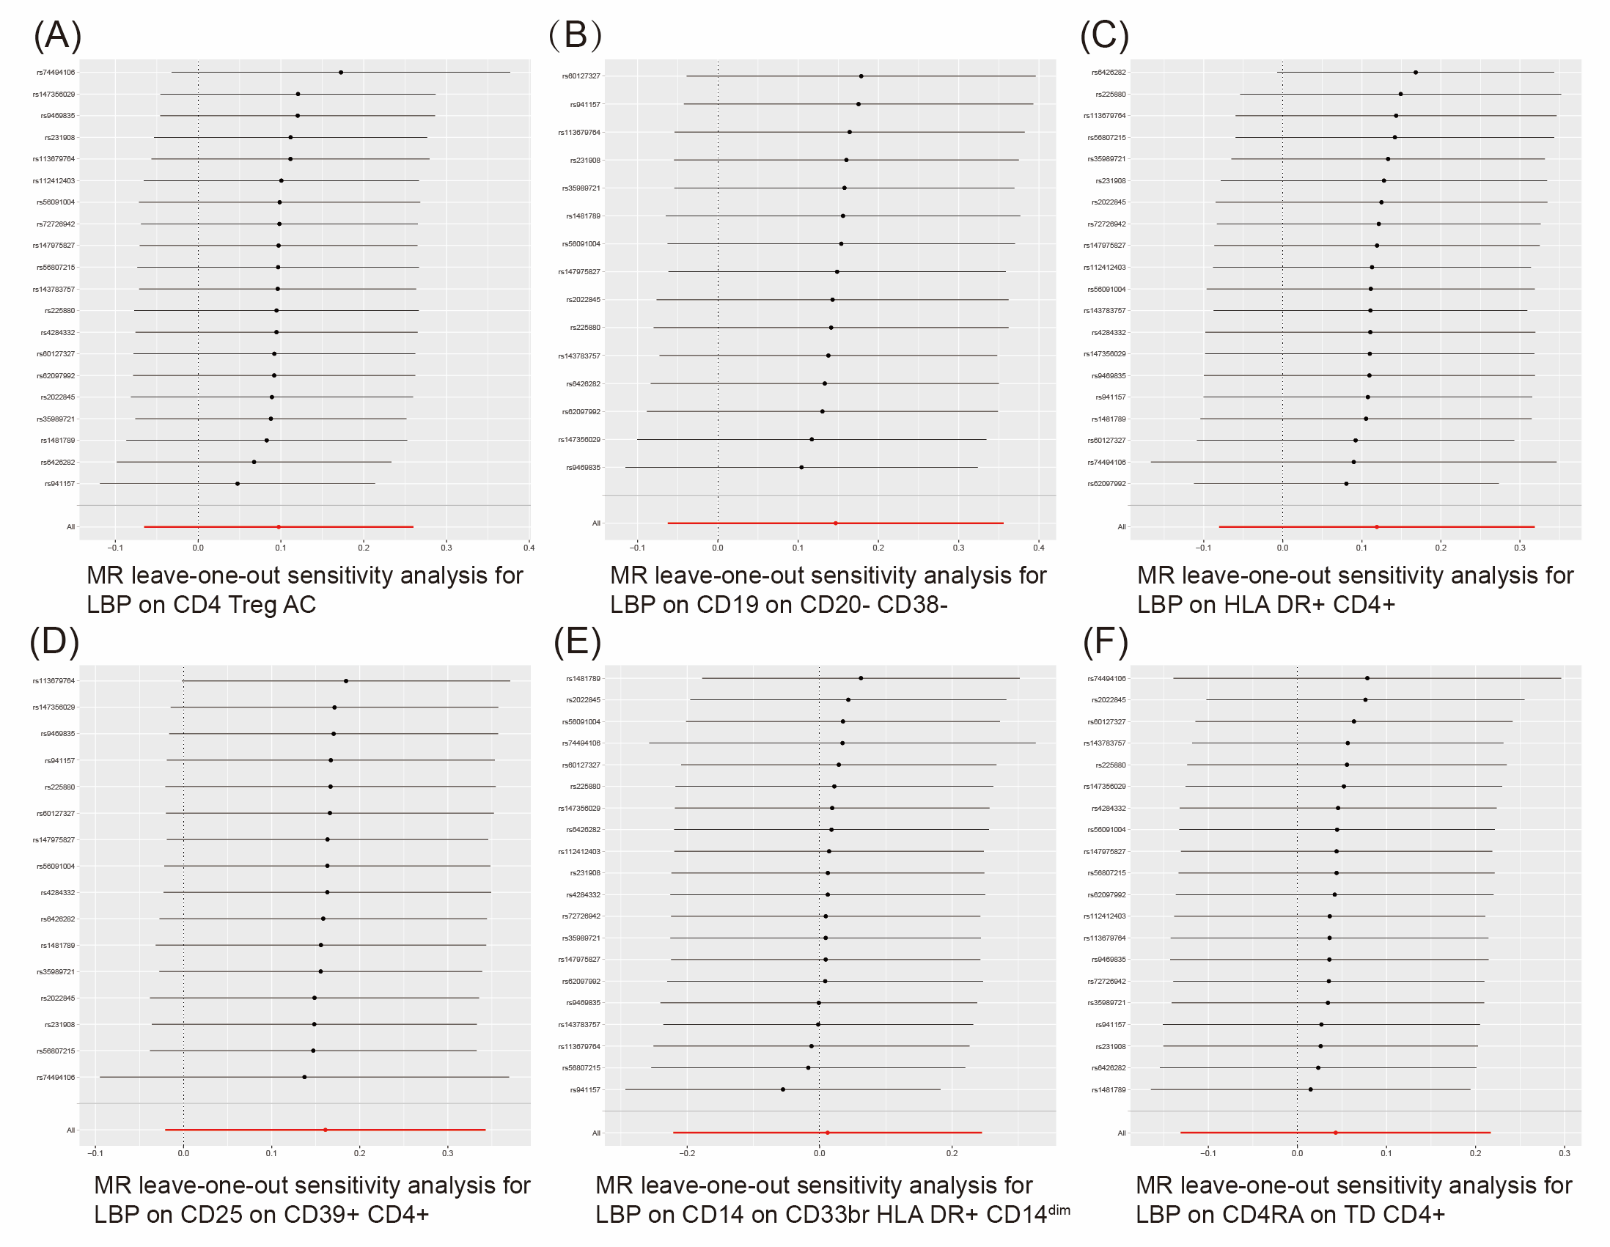

Supplement: Supplementary file 1 [file get_supplementary_file.php]
